# Supplementary figures and images for: Infrared color-sorting metasurfaces
Source: Royal Society of Chemistry journal article supplement (doi:10.1039/d4nr01891e), 2024-01-01

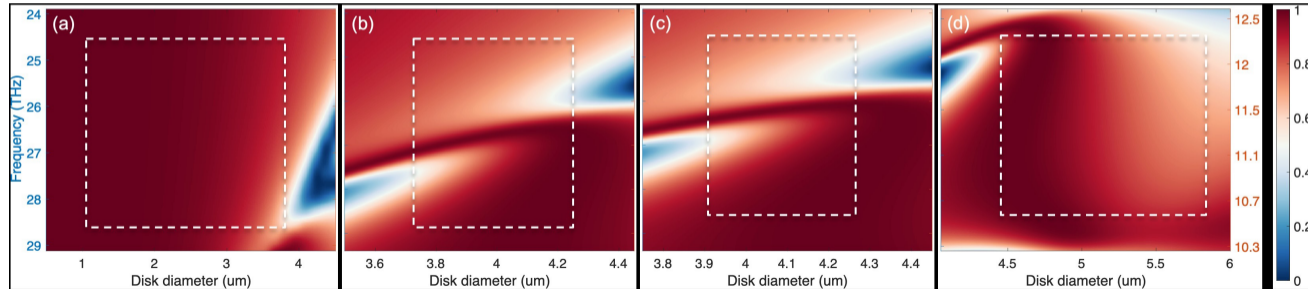

Supplement: d4nr01891e2.pdf [file d4nr01891e2.pdf]

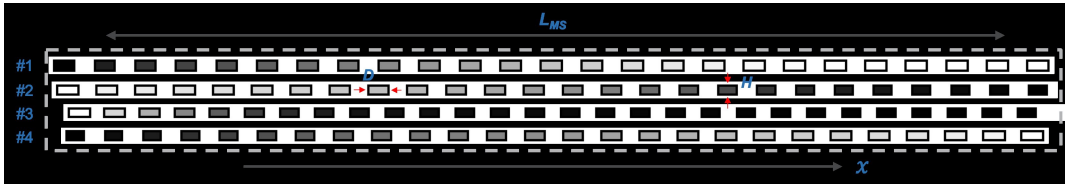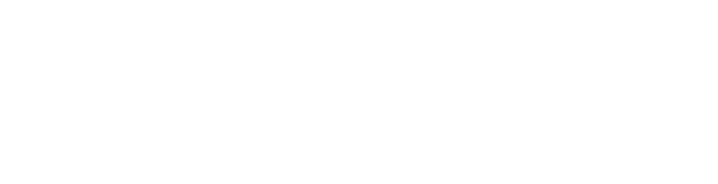

Supplement: d4nr01891e3.pdf [file d4nr01891e3.pdf]
